# Supplementary material for: Preparation and performance studies of polysulfone-sulfated nano-titania (S-TiO2) nanofiltration membranes for dye removal
Source: Royal Society of Chemistry journal article supplement (doi:10.1039/c5ra07994b), 2015-01-01

## Preparation and performance studies of Polysulfone-Sulfated nano-Titania (S-TiO<sub>2</sub>) nanofiltration membranes for dye removal

### Supporting Information

S1

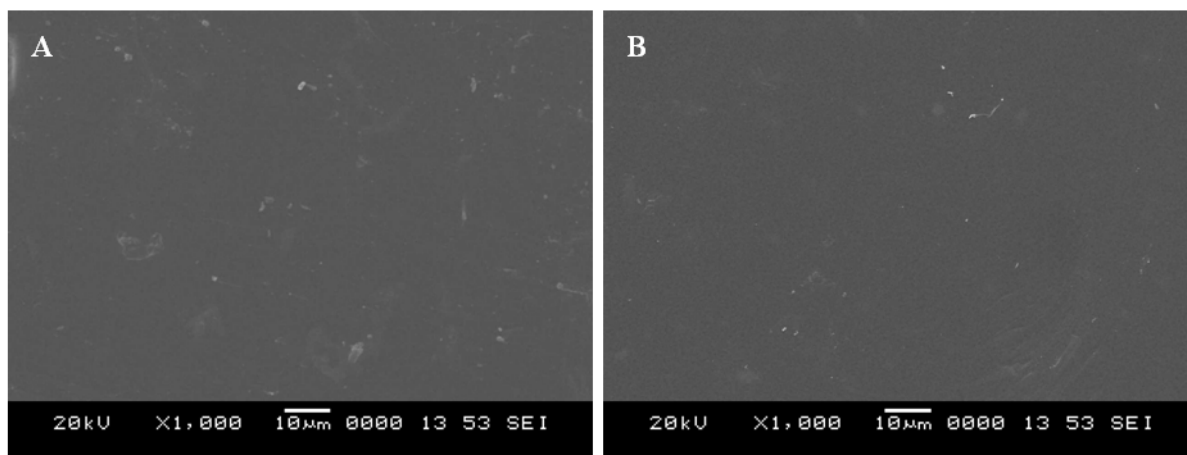

SEM images of the surface of S-2.0 membrane A) before and B) after the UV irradiation

The possible damage under UV irradiation, to the membrane containing highest loading of S-TiO<sub>2</sub> was evaluated by observing the surface of the membranes under SEM, before and after the UV irradiation. No negative effect or any degradation was observed even under long performance test.

S2

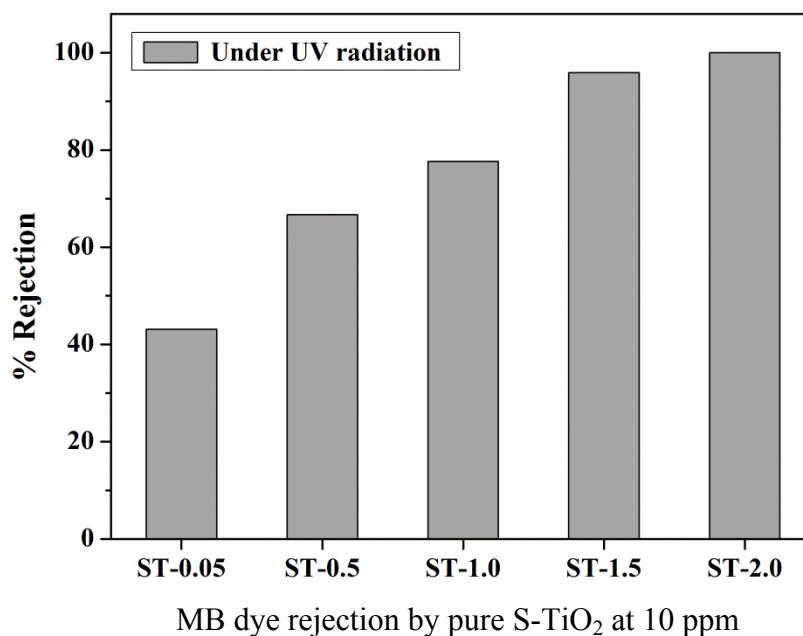

Supplement: c5ra07994b1.pdf [file c5ra07994b1.pdf]
